# Supplementary material
Source: PubMed Central journal article supplement (PMC6203935)
Supplement: NIHMS993279-supplement-Supplementary_Files.pdf [file NIHMS993279-supplement-Supplementary_Files.pdf]

# Supporting Information for ‘Kilobase Pair Chromatin Fiber Contacts Promoted by Living-System-Like DNA Linker Length Distributions and Nucleosome Depletion’

Gavin D Bascom,<sup>†</sup> Taejin Kim,<sup>†</sup> and Tamar Schlick<sup>\*,†,‡,¶</sup>

E-mail: schlick@nyu.edu

Phone: (212) 998-3116 .

---

\*To whom correspondence should be addressed

<sup>†</sup>Department of Chemistry, New York University, 100 Washington Square E, New York, NY, 10003, United States

<sup>‡</sup>Courant Institute of Mathematical Sciences, 251 Mercer St, New York University, New York, NY, 10012, United States

<sup>¶</sup>New York University-East China Normal University Center for Computational Chemistry at New York University Shanghai, Room 340, Geography Building, 3663 North Zhongshan Road, Shanghai, China

## Supplemental Table

|           | Uniform NRL =<br>165 bp | SD    | Life-Like | SD    | Life-like with NFR | SD    | Gene-encoding | SD    | Gene-encoding $\frac{1}{2}$ LH | SD    | Gene-encoding +LH | SD    |
|-----------|-------------------------|-------|-----------|-------|--------------------|-------|---------------|-------|--------------------------------|-------|-------------------|-------|
| $i \pm 1$ | 0.761                   | 0.017 | 0.761     | 0.016 | 0.614              | 0.018 | 0.655         | 0.019 | 0.649                          | 0.008 | 0.608             | 0.010 |
| $i \pm 2$ | 0.820                   | 0.012 | 0.778     | 0.028 | 0.480              | 0.011 | 0.569         | 0.021 | 0.696                          | 0.021 | 0.601             | 0.028 |
| $i \pm 3$ | 0.352                   | 0.015 | 0.354     | 0.034 | 0.194              | 0.010 | 0.246         | 0.015 | 0.250                          | 0.033 | 0.212             | 0.040 |

Table S1: Average number of contacts per simulation summed across 1,000 frames for nucleosome  $i$ , separated by  $k$  nucleosomes, and their respective standard deviations.

## Supplemental Figures

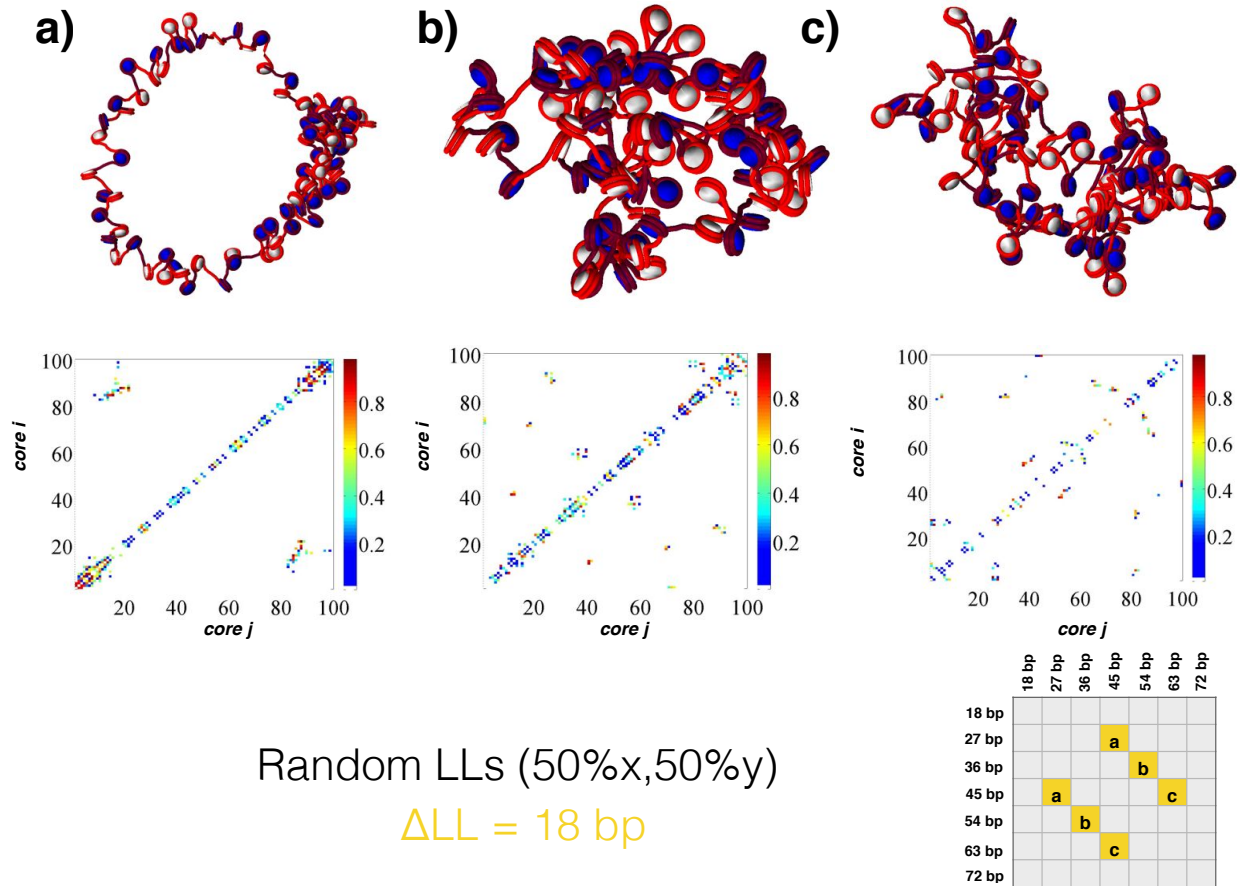

Figure S1

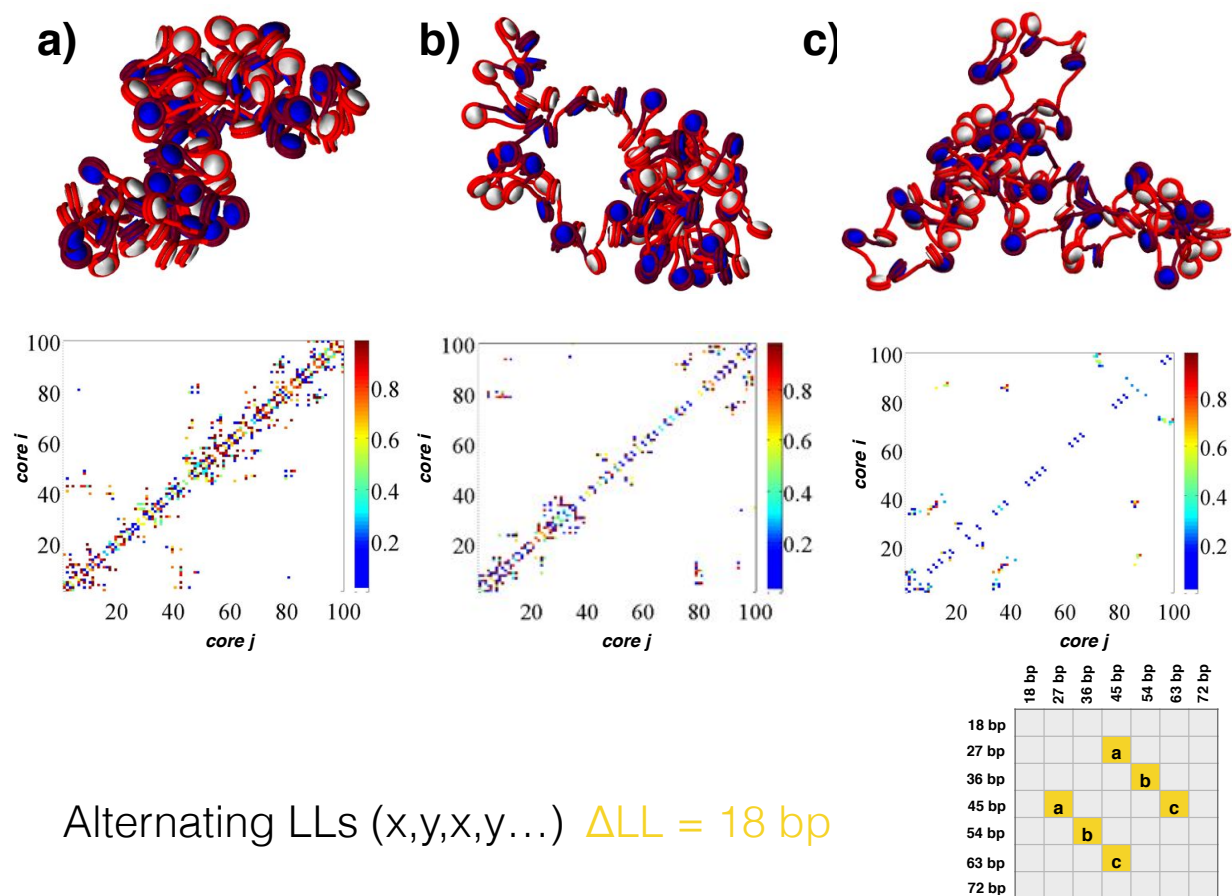

Figure S2

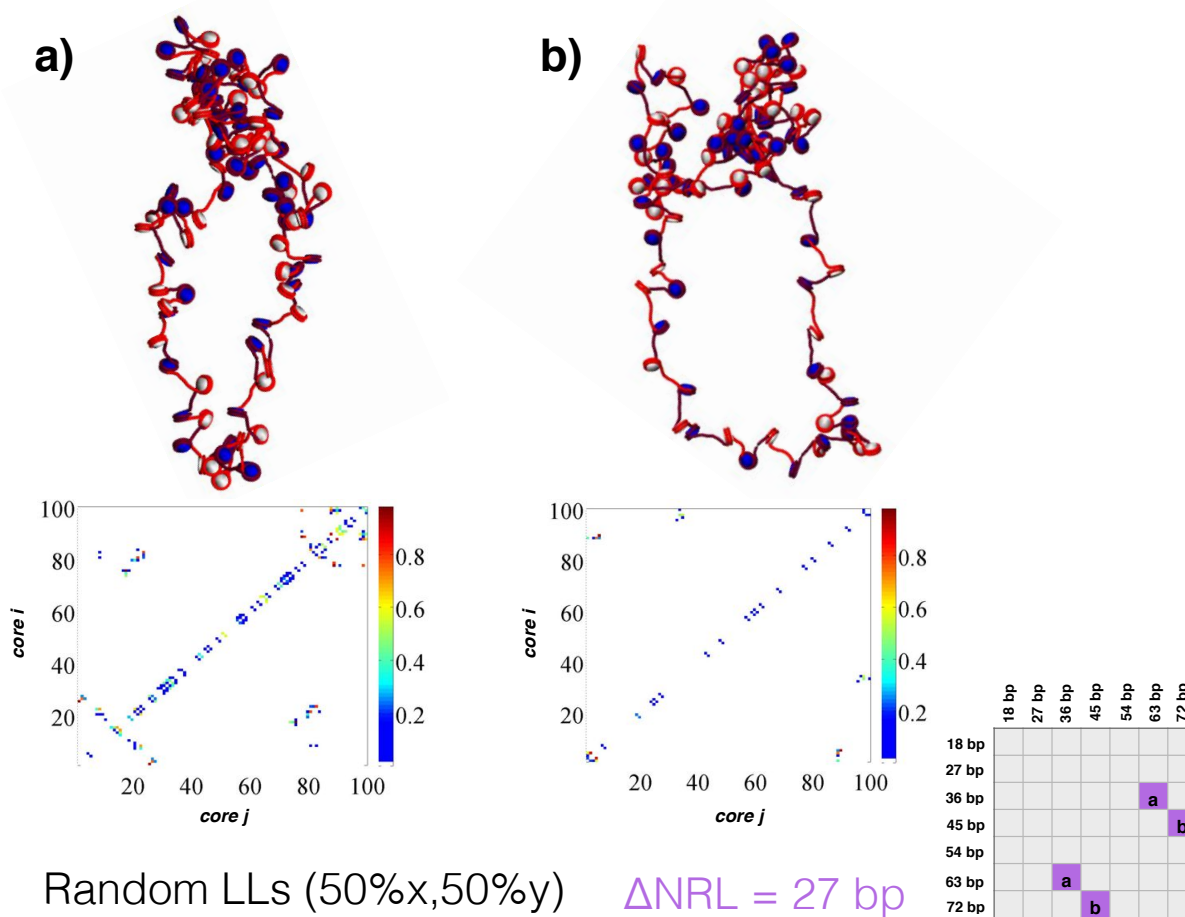

Figure S3

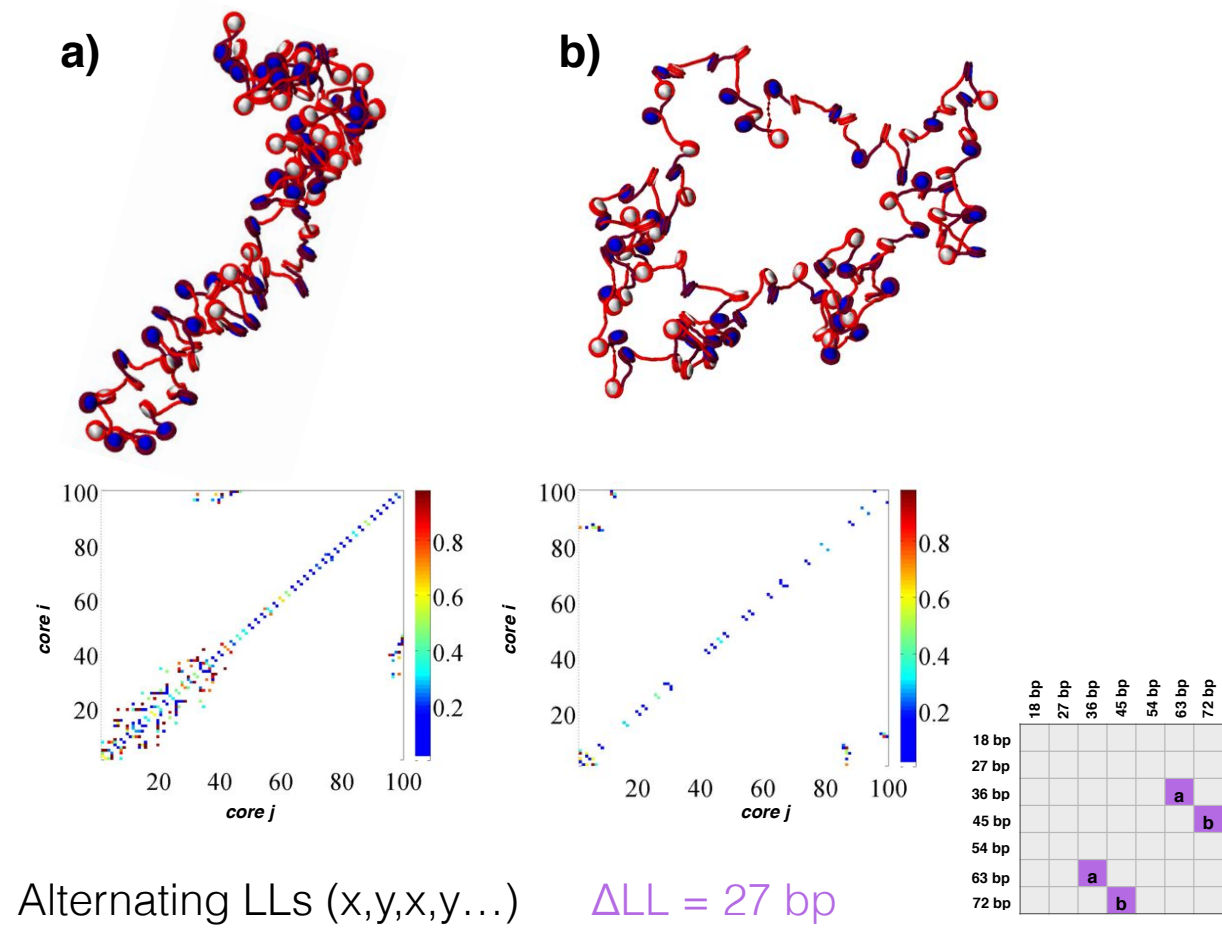

Figure S4

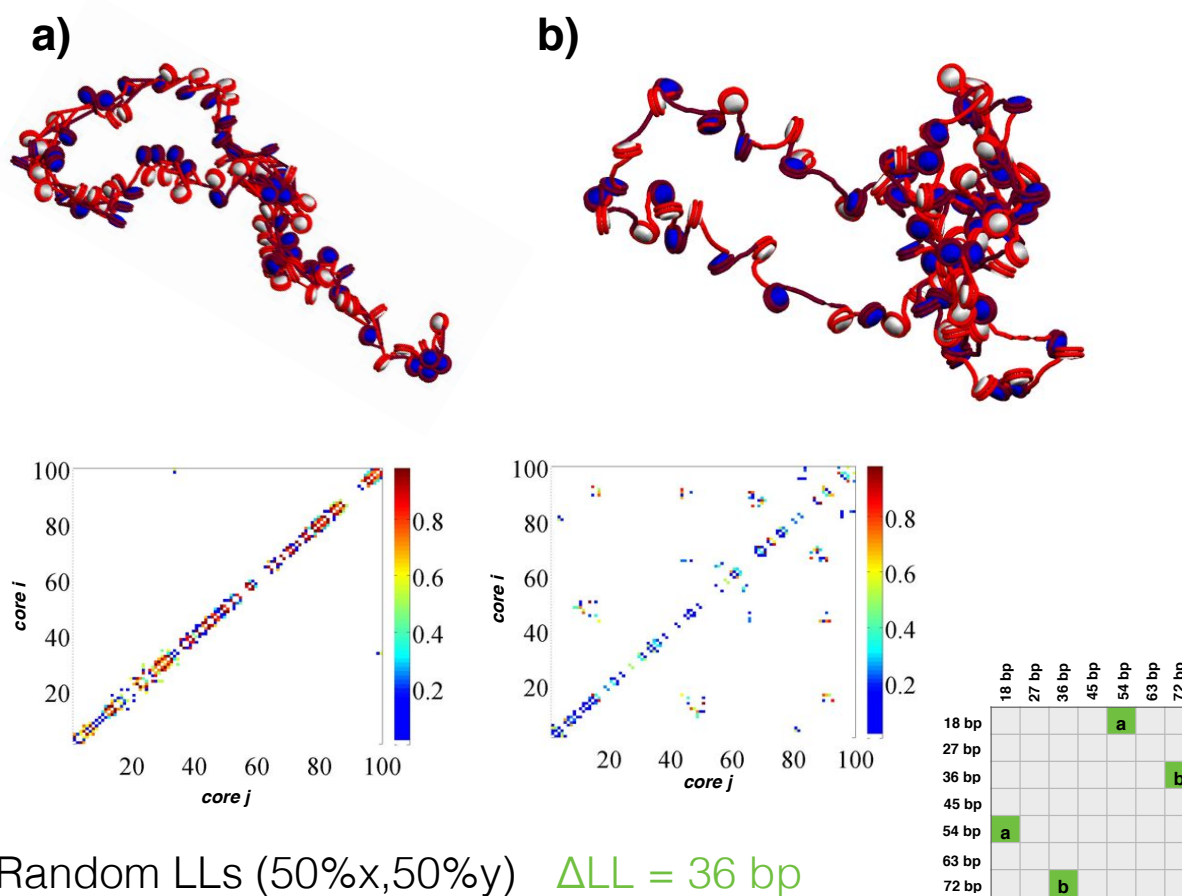

Figure S5

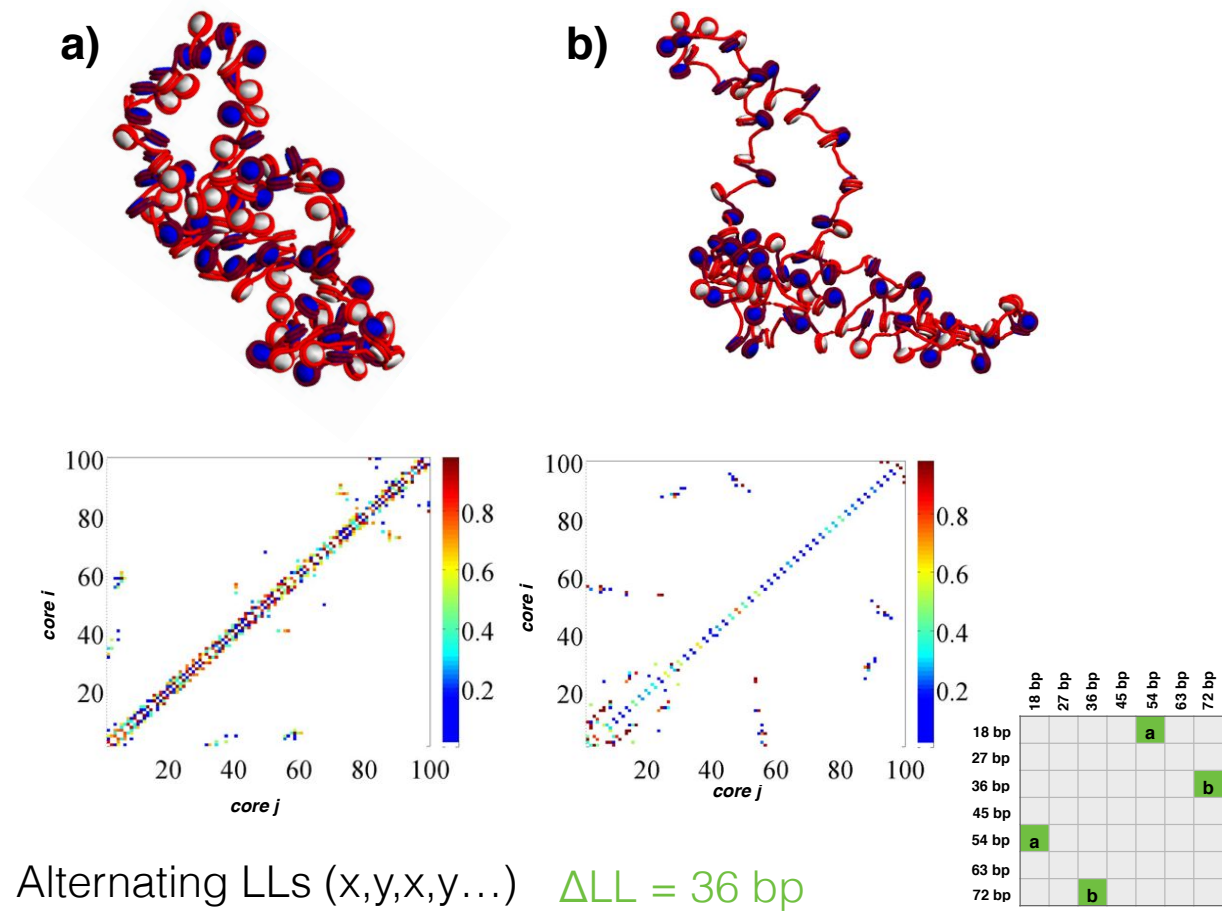

Figure S6



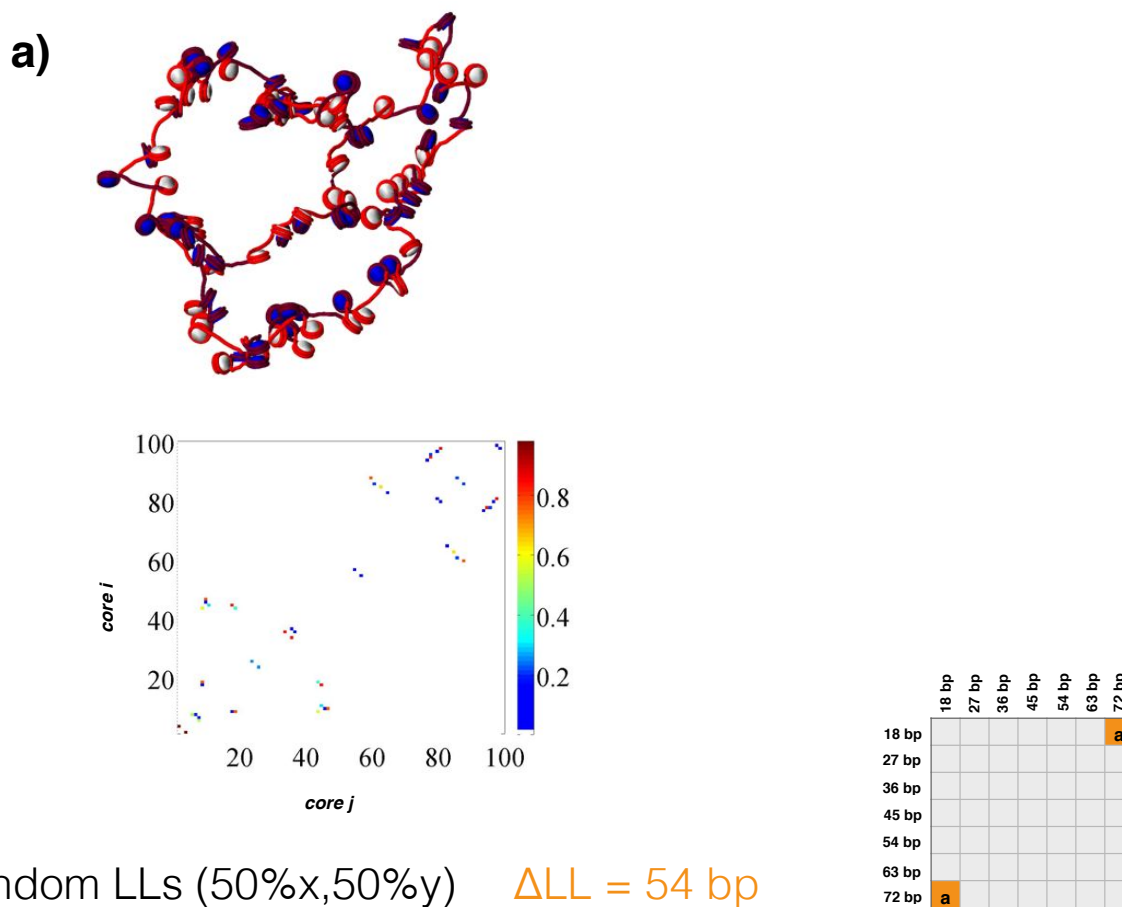

Figure S7

a)

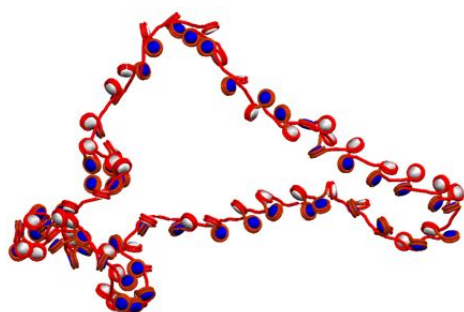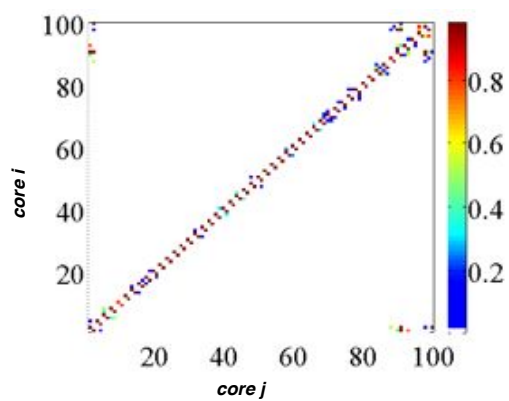

Alternating LLs (x,y,x,y...)  $\Delta LL = 54$  bp

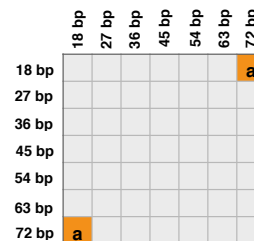

Figure S8

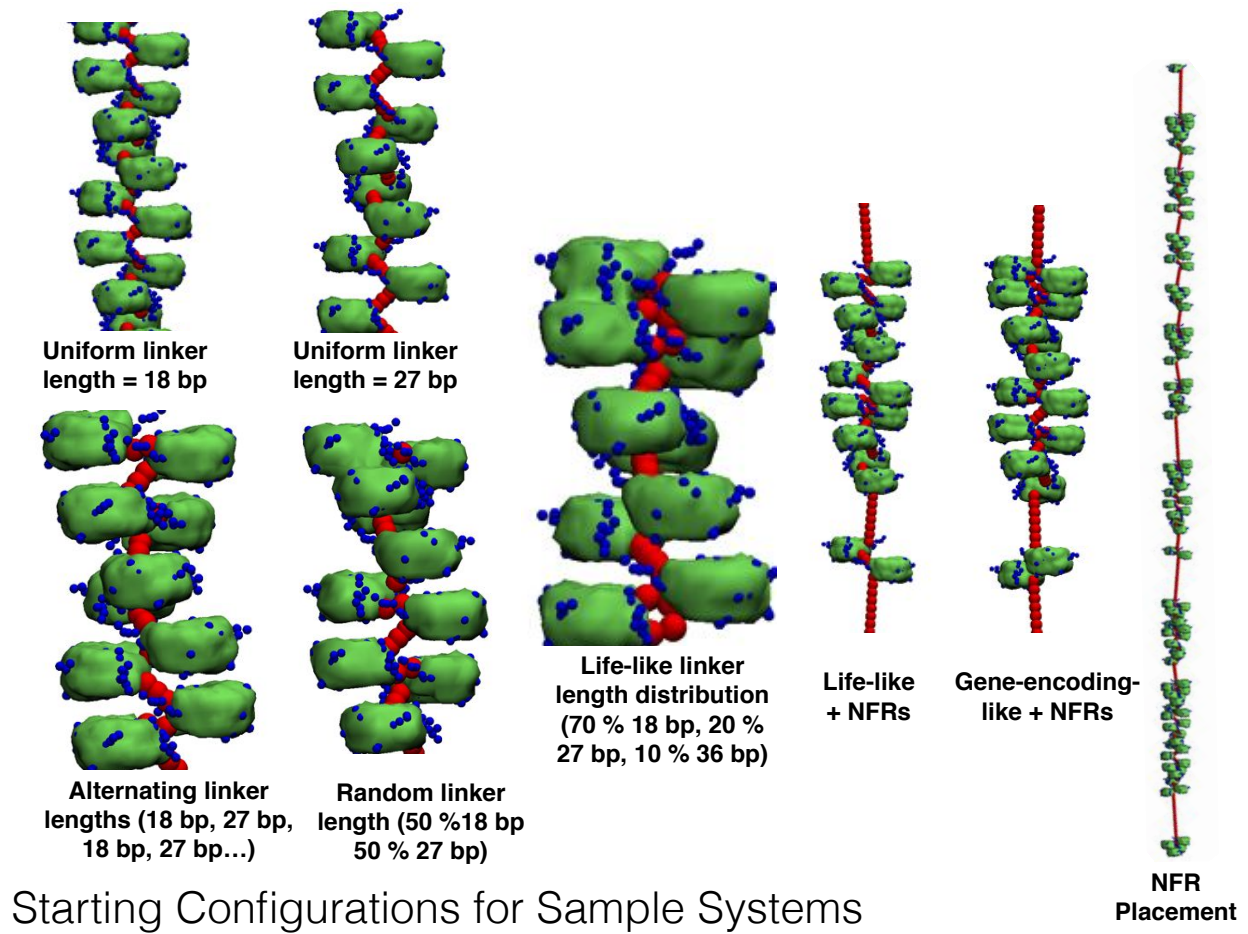

Figure S9
